# Supplementary material
Source: publisher site journal article supplement (https://www.dovepress.com/get_supplementary_file.php?f=280461.docx)
Supplement: Supplementary file 1 [file get_supplementary_file.php]

**Supplementary Tables**

**Table S1** Procedure and DRG Codes to Identify ECMO and Invasive Mechanical Ventilation Use

| **Code set** | **Code** | **Description** |
| --- | --- | --- |
| *Invasive mechanical ventilation* | | |
| ICD10PCS | 5A1935Z | Respiratory Ventilation, Less than 24 Consecutive Hours |
| ICD10PCS | 5A1945Z | Respiratory Ventilation, 24-96 Consecutive Hours |
| ICD10PCS | 5A1955Z | Respiratory Ventilation, Greater than 96 Consecutive Hours |
| ICD10PCS | 0B110F4 | Bypass Trachea to Cutaneous with Tracheostomy Device, Open Approach |
| ICD10PCS | 0B110Z4 | Bypass Trachea to Cutaneous, Open Approach |
| ICD10PCS | 0B114F4 | Bypass Trachea to Cutaneous with Tracheostomy Device, Percutaneous Endoscopic Approach |
| ICD10PCS | 0B114Z4 | Bypass Trachea to Cutaneous, Percutaneous Endoscopic Approach |
| ICD10PCS | 0B113F4 | Bypass Trachea to Cutaneous with Tracheostomy Device, Percutaneous Approach |
| ICD10PCS | 0B113Z4 | Bypass Trachea to Cutaneous, Percutaneous Approach |
| *ECMO* | | |
| CPT | 33946 | Extracorporeal membrane oxygenation (ECMO)/extracorporeal life support (ECLS) provided by physician; initiation, veno-venous |
| CPT | 33947 | Extracorporeal membrane oxygenation (ECMO)/extracorporeal life support (ECLS) provided by physician; initiation, veno-arterial |
| CPT | 33948 | Extracorporeal membrane oxygenation (ECMO)/extracorporeal life support (ECLS) provided by physician; daily management, each day, veno-venous |
| CPT | 33949 | Extracorporeal membrane oxygenation (ECMO)/extracorporeal life support (ECLS) provided by physician; daily management, each day, veno-arterial |
| CPT | 33952 | Extracorporeal membrane oxygenation (ECMO)/extracorporeal life support (ECLS) provided by physician; insertion of peripheral (arterial and/or venous) cannula(e), percutaneous, 6 years and older (includes fluoroscopic guidance, when performed). |
| CPT | 33954 | Extracorporeal membrane oxygenation (ECMO)/extracorporeal life support (ECLS) provided by physician; insertion of peripheral (arterial and/or venous) cannula(e), open, 6 years and older. |
| CPT | 33956 | Extracorporeal membrane oxygenation (ECMO)/ extracorporeal life support (ECLS) provided by physician; insertion of central cannula(e) by sternotomy or thoracotomy, 6 years and older. |
| CPT | 33958 | Extracorporeal membrane oxygenation (ECMO)/extracorporeal life support (ECLS) provided by physician; reposition peripheral (arterial and/or venous) cannula(e), percutaneous, 6 years and older (includes fluoroscopic guidance, when performed). |
| CPT | 33962 | Extracorporeal membrane oxygenation (ECMO)/extracorporeal life support (ECLS) provided by physician; reposition central (arterial and/or venous) cannula(e), open, 6 years and older (includes fluoroscopic guidance, when performed). |
| CPT | 33964 | Extracorporeal membrane oxygenation (ECMO)/extracorporeal life support (ECLS) provided by physician; reposition central cannula(e) by sternotomy or thoracotomy, 6 years and older (includes fluoroscopic guidance, when performed). |
| CPT | 33966 | Extracorporeal membrane oxygenation (ECMO)/extracorporeal life support (ECLS) provided by physician; removal of peripheral (arterial and/or venous) cannula(e), percutaneous, 6 years and older. |
| CPT | 33984 | Extracorporeal membrane oxygenation (ECMO)/extracorporeal life support (ECLS) provided by physician; removal of peripheral (arterial and/or venous) cannula(e), open, 6 years and older. |
| CPT | 33986 | Extracorporeal membrane oxygenation (ECMO)/extracorporeal life support (ECLS) provided by physician; removal of central cannula(e) by sternotomy or thoracotomy, 6 years and older. |
| ICD10PCS | 5A1522F | Extracorporeal Oxygenation, Membrane, Central |
| ICD10PCS | 5A1522G | Extracorporeal Oxygenation, Membrane, Peripheral Veno-arterial |
| ICD10PCS | 5A1522H | Extracorporeal Oxygenation, Membrane, Peripheral Veno-venous |
| ICD10PCS | 5A15223 | Extracorporeal Membrane Oxygenation, Continuous |
| *ECMO or invasive MV* | | |
| DRG | 003 | ECMO or tracheostomy with MV > 96 hours or PDX except face, mouth and neck with major O.R. procedure |
| DRG | 004 | Tracheostomy with MV > 96 hours or PDX except face, mouth and neck without major O.R. procedure |
| DRG | 207 | Respiratory system diagnosis with ventilatory support > 96 hours |
| DRG | 208 | Respiratory system diagnosis with ventilatory support ≤ 96 hours |
| DRG | 870 | Septicemia or severe sepsis with MV > 96 hours |

**Abbreviations:** CPT, Current Procedural Terminology; DRG, Diagnosis Related Group; ECMO, extracorporeal membrane oxygenation; ICD, International Classification of Diseases; MV, mechanical ventilation; PCS, Procedure Coding System

**Table S2** Sample Attrition

| **Cohort selection step** | **Number of hospitalizations** | |
| --- | --- | --- |
|  | **MarketScan® Commercial Claims and Encounters and Medicare Supplemental and Coordination of Care database** | **Medicare-FFS** |
| All primary or secondary diagnosis of viral pneumonia between January 1, 2018 and June 30, 2019 | 22,338 | 148,938 |
| Meeting diagnosis code and age criteriaa | 6,083 | 120,812 |
| Total payment > 0 | 6,083 | 118,843 |
| Excluding hospitalizations with ECMO or with iMV but no ICU | 6,055 | 118,419 |

**Notes:** aDiagnosis code criteria were ICD-10-CM J09 (Influenza due to certain identified influenza virus), J10 (Influenza due to other identified influenza virus), J11 (Influenza due to unidentified influenza virus), or J12 (Viral pneumonia, not elsewhere classified) in the primary/discharge diagnosis position, or J80 (Acute respiratory distress syndrome) if accompanied by J09, J10, J11, or J12 in the secondary position; age criteria were > 18 years for the MarketScan® database and ≥ 65 years for the Medicare FFS database.

**Abbreviations:** ECMO, extracorporeal membrane oxygenation; FFS, fee for service; ICU, intensive care unit; iMV, invasive mechanical ventilation

**Table S3** Ordinary Least Squares Regression Analysis for Estimating Incremental Costs of an Additional Inpatient Day for Viral Pneumonia Among Commercially-insured Claims Patients

| **Variable** | **Hospitalizations with ICU** | | | | **ICU** | | | |
| --- | --- | --- | --- | --- | --- | --- | --- | --- |
|  | **Base case**  **(n = 1,356)a** | | **Sensitivity analysis on all qualified hospitalizations**  **(n = 1,378)** | | **Base case**  **(n = 1,366)a** | | **Sensitivity analysis on all qualified hospitalizations**  **(n = 1,378)** | |
|  | **Estimate (SE), $** | ***P*** | **Estimate (SE), $** | ***P*** | **Estimate (SE), $** | ***P*** | **Estimate (SE), $** | ***P*** |
| Intercept | 16,322 (2,559) | < 0.0001 | 18,286 (5,707) | 0.0014 | 11,208 (4,893) | 0.0221 | 13,326 (6007) | 0.0267 |
| Male | 1,102 (1,317) | 0.4031 | 7,051 (2,968) | 0.0176 | 3,415 (2,468) | 0.167 | 6,780 (3,084) | 0.0281 |
| Age group, years |  |  |  |  |  |  |  |  |
| 45-64 | 695 (1,872) | 0.7105 | -2245 (4,202) | 0.5933 | 2,318 (3,502) | 0.508 | -852 (4,368) | 0.8454 |
| 65-74 | -131 (2,838) | 0.9632 | -8814 (6,400) | 0.1687 | 619 (5,312) | 0.907 | -4,319 (6,652) | 0.5163 |
| ≥ 75 | 1248 (2,1004) | 0.5531 | -5800 (2,968) | 0.2195 | 3,752 (3,931) | 0.34 | -1,813 (4,904) | 0.7116 |
| Geographic region |  |  |  |  |  |  |  |  |
| North central | 1516 (2,161) | 0.483 | 30 (4798) | 0.995 | -4,710 (4,148) | 0.2564 | -4,870 (5,077) | 0.3376 |
| Northeast | 18153 (2,422) | < 0.0001 | 11668 (5402) | 0.031 | 17,741 (4,559) | 0.0001 | 14,002 (5,627) | 0.013 |
| South | 7285 (1,935) | 0.0002 | 6426 (4302) | 0.1355 | 5,060 (3,769) | 0.1796 | 220 (4.598) | 0.9618 |
| West | 16,322 (2,559) | < 0.0001 | 18286 (5707) | 0.0014 | 11,208 (4,893) | 0.0221 | 13,326 (6,007) | 0.0267 |
| iMV | 25,293 (3,116) | < 0.0001 | 14,360 (6,806) | 0.0351 | 35,482 (5,761) | < 0.0001 | 19,759 (7,072) | 0.0053 |
| Additional day | 3,900 (157) | < 0.0001 | 5,646 (258) | < 0.0001 | 5,254 (394) | < 0.0001 | 6,853 (371) | < 0.0001 |

**Notes:** aLength of stay or costs that exceeded the 99th percentile were excluded.

**Abbreviations:** ICU, intensive care unit; iMV, invasive mechanical ventilation; LOS, length of stay; SE, standard error

**Table S4** Ordinary Least Squares Regression Analysis for Estimating Incremental Costs of an Additional Inpatient Day for Viral Pneumonia Among Medicare-FFS Claims Patients

| **Variable** | **Hospitalizations with ICU** | | | | **ICU** | | | |
| --- | --- | --- | --- | --- | --- | --- | --- | --- |
|  |  | | | |  | | | |
|  |  | | | |  | | | |
|  | **Base case**  **(n = 27,836)a** | | **Sensitivity analysis on all hospitalizations**  **(n = 28,249)** | | **Base case**  **(n = 27,836)a** | | **Sensitivity analysis on all hospitalizations**  **(n = 28,249)** | |
|  | **Estimate (SE), $** | ***P*** | **Estimate (SE), $** | ***P*** | **Estimate (SE), $** | ***P*** | **Estimate (SE), $** | ***P*** |
| Intercept | 18,559 (162) | < 0.0001 | 18,315 (257) | < 0.0001 | 21,928 (168) | < 0.0001 | 22,964 (267) | < 0.0001 |
| Sex |  |  |  |  |  |  |  |  |
| Female | -147 (59) | 0.0128 | -337 (96) | 0.0004 | -36 (64) | 0.5681 | -193 (103) | 0.0623 |
| Male | 0 | — | 0 | — | 0 | — | 0 | — |
| Age group, years |  |  |  |  |  |  |  |  |
| 65-70 | 910 (88) | < 0.0001 | 1549 (144) | < 0.0001 | 762 (96) | < 0.0001 | 1,462 (155) | < 0.0001 |
| 71-75 | 696 (88) | < 0.0001 | 1247 (143) | < 0.0001 | 577 (95) | < 0.0001 | 1,187 (154) | < 0.0001 |
| 76-80 | 498 (87) | < 0.0001 | 937 (142) | < 0.0001 | 430 (95) | < 0.0001 | 891 (153) | < 0.0001 |
| 81-85 | 274 (88) | 0.0019 | 456 (144) | 0.0016 | 247 (96) | 0.0102 | 420 (156) | 0.007 |
| ≥ 86 | 0 | — | 0 | — | 0 | — | 0 | — |
| Geographic region |  |  |  |  |  |  |  |  |
| Midwest | -2350 (88) | < 0.0001 | -3143 (144) | < 0.0001 | -2246 (96) | < 0.0001 | -3,024 (155) | < 0.0001 |
| Northeast | -1241 (99) | < 0.0001 | -1770 (160) | < 0.0001 | -805 (107) | < 0.0001 | -1,002 (172) | < 0.0001 |
| South | -2733 (82) | < 0.0001 | -3471 (133) | < 0.0001 | -2754 (89) | < 0.0001 | -3,583 (144) | < 0.0001 |
| West | 0 | — | 0 | — | 0 | — | 0 | — |
| US territories | -4314 (742) | < 0.0001 | -7082 (1,166) | < 0.0001 | -2733 (805) | 0.0007 | -5,602 (1256) | < 0.0001 |
| Foreign countries | 4857 (2797) | 0.0824 | 1991 (4,594) | 0.6647 | 6596 (3035) | 0.0297 | 4,388 (4948) | 0.3752 |
| iMV |  |  |  |  |  |  |  |  |
| No | -11,693 (119) | < 0.0001 | -14,155 (188) | < 0.0001 | -13,101 (127) | < 0.0001 | -16,215 (200) | < 0.0001 |
| Yes | 0 | — | 0 | — | 0.00 | — | 0.00 | — |
| Additional day | 668 (7) | < 0.0001 | 1150 (10) | < 0.0001 | 608 (11) | < 0.0001 | 1,260 (14) | < 0.0001 |

**Notes:** aLength of stay or costs that exceeded the 99th percentile were excluded.

**Abbreviations:** ICU, intensive care unit; iMV, invasive mechanical ventilation; LOS, length of stay; SE, standard error
